# Supplementary figures and images for: COSMO-RI-ADC(2) excitation energies and excited state gradients
Source: Royal Society of Chemistry journal article supplement (doi:10.1039/c8cp00643a), 2018-01-01

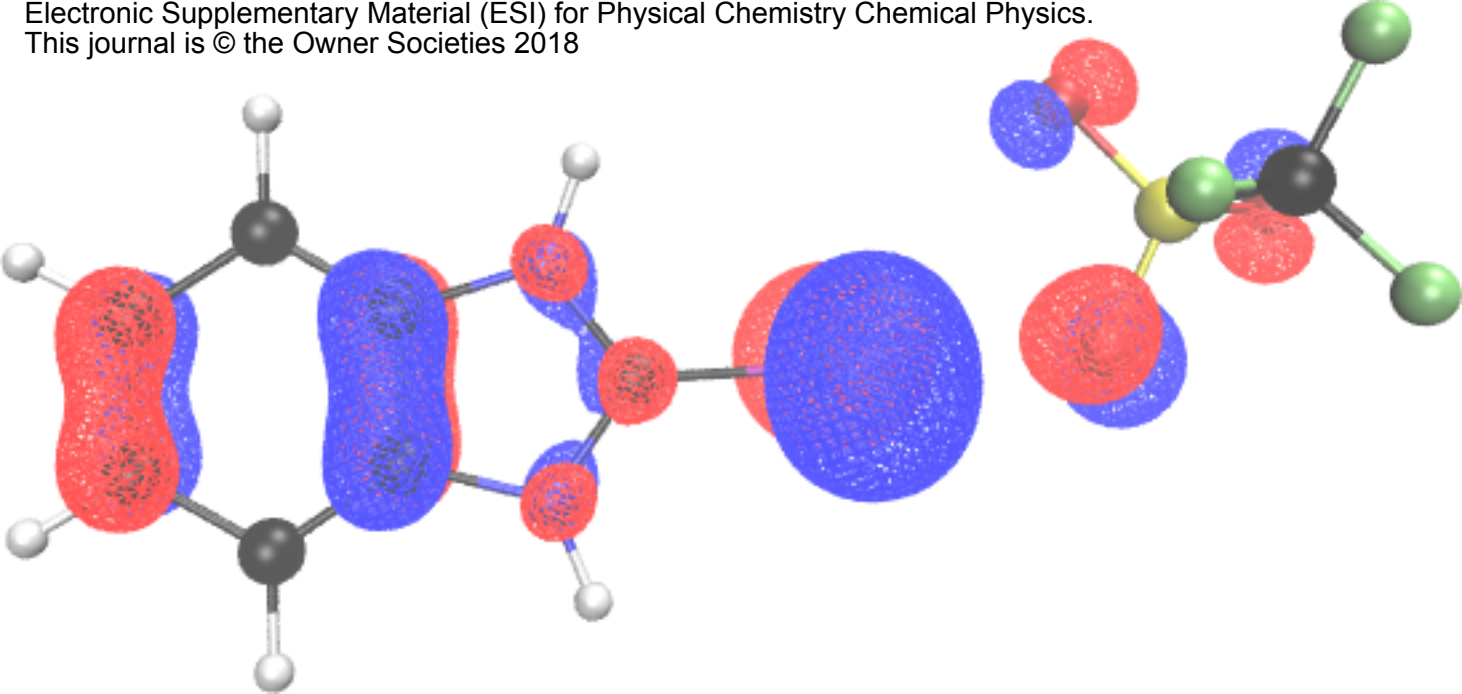

Supplement: c8cp00643a1.pdf [file c8cp00643a1.pdf]

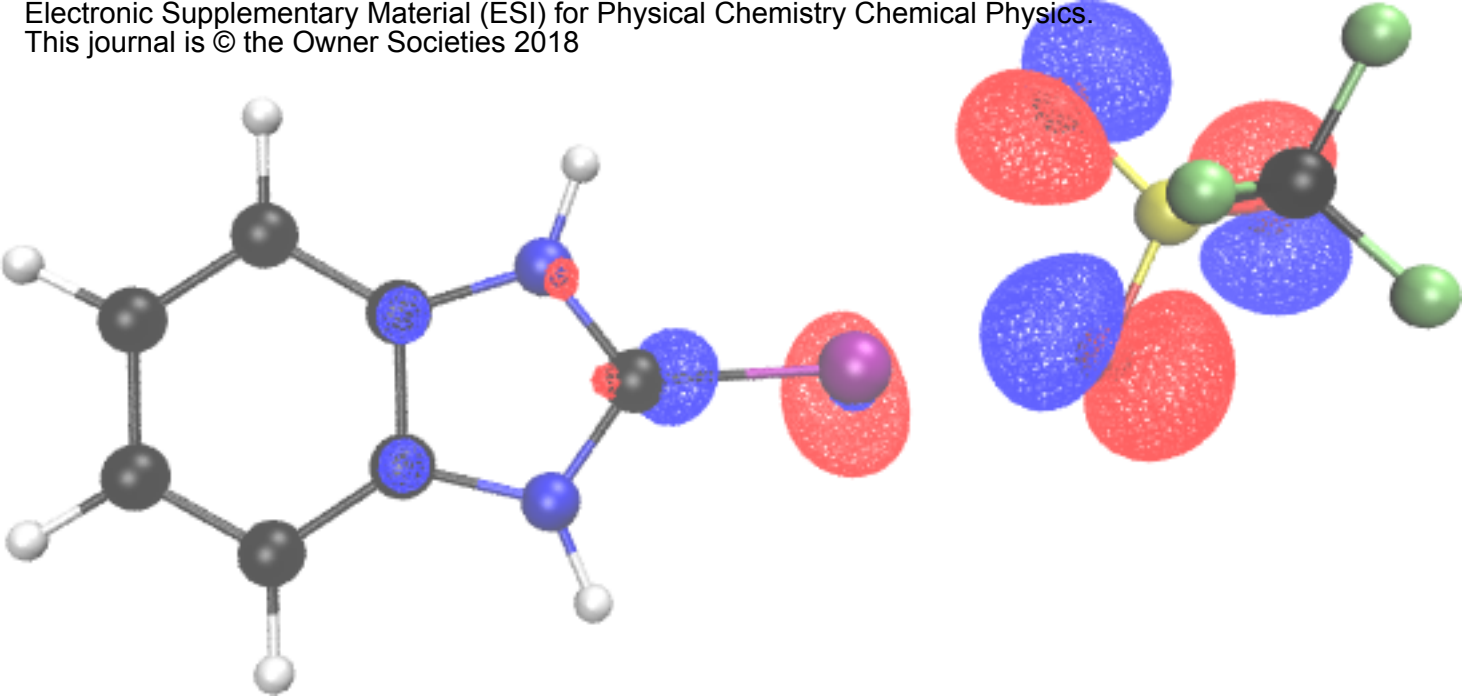

Supplement: c8cp00643a2.pdf [file c8cp00643a2.pdf]
